# Supplementary material
Source: PubMed Central journal article supplement (PMC2860786)
Supplement: NIHMS184587-supplement-Supp_Table_S1.pdf [file NIHMS184587-supplement-Supp_Table_S1.pdf]

**Supplementary Table S1.** List of liver-specific transcription factors for *APOH* promoter (Matinspector)

| Family | Further Information                        | Start pos. | End pos. | Strand | Sequence                   |
|--------|--------------------------------------------|------------|----------|--------|----------------------------|
| CEBP   | Ccaat/Enhancer Binding Protein             | 79         | 93       | -      | cagcttgaGAAAtct            |
| NR2F   | Nuclear receptor subfamily 2 factors       | 99         | 123      | -      | tccagaggctctAAAAtccctgaga  |
| NF1F   | Nuclear factor 1                           | 116        | 136      | -      | atcTTGGtttatccagagg        |
| FKHD   | Fork head domain factors                   | 120        | 136      | +      | tggataTAAAccaagat          |
| VTBP   | Vertebrate TATA binding protein factor     | 121        | 137      | +      | ggataTAAAccaagatc          |
| INRE   | Core promoter initiator elements           | 139        | 149      | -      | tcTCATtggg                 |
| HNF1   | Hepatic Nuclear Factor 1                   | 159        | 175      | +      | gGTTAtttattcagagc          |
| CLOX   | CLOX and CLOX homology (CDP) factors       | 165        | 187      | +      | ttattcagagcttgctATAGgaa    |
| HNF1   | Hepatic Nuclear Factor 1                   | 189        | 205      | -      | tGTTAatggctgcctcc          |
| CLOX   | CLOX and CLOX homology (CDP) factors       | 194        | 216      | -      | ccaaacacaactgtaATGGctg     |
| NF1F   | Nuclear factor 1                           | 210        | 230      | -      | actttgagctctGCCAaaca       |
| HNF6   | Onecut homeodomain factor HNF6             | 222        | 238      | +      | actcaaagTCAAagtca          |
| VTBP   | Vertebrate TATA binding protein factor     | 250        | 266      | -      | tattaTAAAgctttccc          |
| CLOX   | CLOX and CLOX homology (CDP) factors       | 286        | 308      | -      | ccaaCAATccgttggagcacacc    |
| CLOX   | CLOX and CLOX homology (CDP) factors       | 345        | 367      | -      | tctctaacCAATcacatggacac    |
| CLOX   | CLOX and CLOX homology (CDP) factors       | 398        | 420      | +      | agttggccaactgctATAGagg     |
| RXRF   | RXR heterodimer binding sites              | 453        | 477      | +      | agatgtgtgggcagGTTcgttt     |
| PERO   | Peroxisome proliferator-activated receptor | 454        | 476      | +      | gatgtgtgggtcagAGTTctgtt    |
| NR2F   | Nuclear receptor subfamily 2 factors       | 455        | 479      | +      | atgtgtgggtcagAGTTctgtttc   |
| FKHD   | Fork head domain factors                   | 468        | 484      | -      | tatgtgaaAACAgaact          |
| VTBP   | Vertebrate TATA binding protein factor     | 495        | 511      | -      | atataTAAAtggacaat          |
| VTBP   | Vertebrate TATA binding protein factor     | 497        | 513      | -      | ggataTATAaatggaca          |
| PTBP   | Plant TATA binding protein factor          | 498        | 512      | -      | gataTATAaatggac            |
| PTBP   | Plant TATA binding protein factor          | 500        | 514      | -      | aggaTATAaatgg              |
| EKLF   | Basic and erythroid krueppel like factors  | 564        | 580      | -      | tcggaaGGGGggtgttc          |
| CLOX   | CLOX and CLOX homology (CDP) factors       | 662        | 684      | -      | ttgaaaattGATTtgaattaac     |
| HNF6   | Onecut homeodomain factor HNF6             | 666        | 682      | +      | atttcaaTCAAtttc            |
| CLOX   | CLOX and CLOX homology (CDP) factors       | 667        | 689      | +      | tttcaaATCAattttcaaattcc    |
| CLOX   | CLOX and CLOX homology (CDP) factors       | 727        | 749      | -      | ctcctcATCCatttctaataatgt   |
| NR2F   | Nuclear receptor subfamily 2 factors       | 742        | 766      | -      | cagatcaatacAAAGtcctctcat   |
| CLOX   | CLOX and CLOX homology (CDP) factors       | 747        | 769      | -      | cgtcagATCAatacaaatgctcctc  |
| RXRF   | RXR heterodimer binding sites              | 751        | 775      | -      | ctcttaCGTCagatcaatacaaaagt |
| CLOX   | CLOX and CLOX homology (CDP) factors       | 752        | 774      | +      | ctttgtattGATCtgacgtaaga    |
| PARF   | PAR/bZIP family                            | 760        | 776      | +      | tgatctgacGTAAgaga          |
| CEBP   | Ccaat/Enhancer Binding Protein             | 761        | 775      | +      | gatctgacGTAAgag            |
| RXRF   | RXR heterodimer binding sites              | 788        | 812      | +      | tcaaggataGCTCtaaggctctaac  |
| NR2F   | Nuclear receptor subfamily 2 factors       | 790        | 814      | +      | aaggatagctctaAGGTcctaactg  |
| VTBP   | Vertebrate TATA binding protein factor     | 922        | 938      | -      | ctctTAAAtgatgtt            |
| NR2F   | Nuclear receptor subfamily 2 factors       | 962        | 986      | +      | ggtgtttgtcCAAAGtttatatgcc  |
| VTBP   | Vertebrate TATA binding protein factor     | 969        | 985      | -      | gcataTAAActttggac          |
| FKHD   | Fork head domain factors                   | 970        | 986      | -      | ggcataTAAActttgga          |
| FKHD   | Fork head domain factors                   | 1077       | 1093     | +      | accccggaACAacaag           |
| CLOX   | CLOX and CLOX homology (CDP) factors       | 1104       | 1126     | -      | cacaaaacagttcattATTGctt    |
| CLOX   | CLOX and CLOX homology (CDP) factors       | 1106       | 1128     | +      | gcaaTAATgaactgtttgtgcc     |
| FKHD   | Fork head domain factors                   | 1135       | 1151     | -      | gtcttcATAAcgttttt          |
| PARF   | PAR/bZIP family                            | 1166       | 1182     | +      | aaagaTTCataacaga           |
| PARF   | PAR/bZIP family                            | 1167       | 1183     | -      | ctctgTTATgaaatctt          |
| CEBP   | Ccaat/Enhancer Binding Protein             | 1168       | 1182     | -      | tctgttatGAAAtct            |
| HNF1   | Hepatic Nuclear Factor 1                   | 1196       | 1212     | -      | cTTTAatcatttacttt          |
| HNF1   | Hepatic Nuclear Factor 1                   | 1198       | 1214     | +      | agtAAATgattaagaa           |
| FKHD   | Fork head domain factors                   | 1253       | 1269     | -      | tctttgtaAATAgaaga          |
| NR2F   | Nuclear receptor subfamily 2 factors       | 1261       | 1285     | +      | ttacaaagataAAAGtacaccagaa  |
| HNF1   | Hepatic Nuclear Factor 1                   | 1289       | 1305     | +      | gGTTAatgtttaagcgc          |
| FKHD   | Fork head domain factors                   | 1290       | 1306     | -      | agcgcTAAAcattaac           |
| VTBP   | Vertebrate TATA binding protein factor     | 1292       | 1308     | +      | taatgtTAAAGcgttt           |
| CLOX   | CLOX and CLOX homology (CDP) factors       | 1371       | 1393     | -      | tgagcactggagaaATCAAttgtg   |
